# Supplementary material for: CuN10: a high-energy-density pentazolate with an antiferromagnetic state
Source: Royal Society of Chemistry journal article supplement (doi:10.1039/d5cp00456j), 2025-01-01
Supplement: d5cp00456j1.pdf [file d5cp00456j1.pdf]

# Supplemental Material for

## **CuN<sub>10</sub>: A High-Energy-Density Pentazolates with Antiferromagnetic State**

Wencai Yi,<sup>\*a,b</sup> Yuqiu Zhang,<sup>a</sup> Guanghui Zhang,<sup>a</sup> Xiaobing Liu<sup>\*a,b</sup>

<sup>a</sup> *Laboratory of High Pressure Physics and Material Science, School of Physics and Physical Engineering, Qufu Normal University, Qufu, 273165, China*

<sup>b</sup> *Advanced Research Institute of Multidisciplinary Sciences, Qufu Normal University, Qufu, 273165, China*

### **Corresponding Author**

Wencai Yi: [yiwc@qfnu.edu.cn](mailto:yiwc@qfnu.edu.cn)

Xiaobing Liu: [xiaobing.phy@qfnu.edu.cn](mailto:xiaobing.phy@qfnu.edu.cn)

**Tab. S1.** Calculated lattice constants and atomic positions of the  $P2_12_12_1$ -CuN<sub>10</sub> structures.

| Allotrope                           | Lattice(Å)                                   | Space group  | Atomic positions                            |
|-------------------------------------|----------------------------------------------|--------------|---------------------------------------------|
| $P2_12_12_1$ -<br>CuN <sub>10</sub> | $a=8.307$                                    | $P2_12_12_1$ | Cu1(0.750 0.215 0.239)                      |
|                                     | $b=8.166$                                    |              | N1(0.075 0.142 0.094) N2(0.954 0.099 0.185) |
|                                     |                                              |              | N3(0.989 0.961 0.253) N4(0.132 0.919 0.205) |
|                                     |                                              |              | N5(0.186 0.030 0.106) N6(0.953 0.671 0.801) |
|                                     |                                              |              | N7(0.039 0.700 0.924) N8(0.149 0.586 0.931) |
| $c=9.031$                           | N9(0.128 0.488 0.812) N10(0.006 0.540 0.732) |              |                                             |

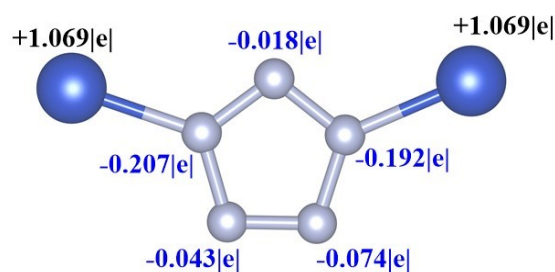

**Fig. S1.** The atomic Bader charge transfer in  $P2_12_12_1$ -CuN<sub>10</sub> crystal.

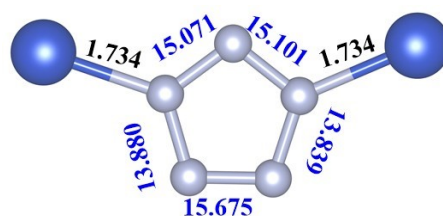

**Fig. S2.** The integral crystal orbital Hamilton populations (-ICOHP) of Cu-N and N-N bonds in  $P2_12_12_1$ -CuN<sub>10</sub> crystal.

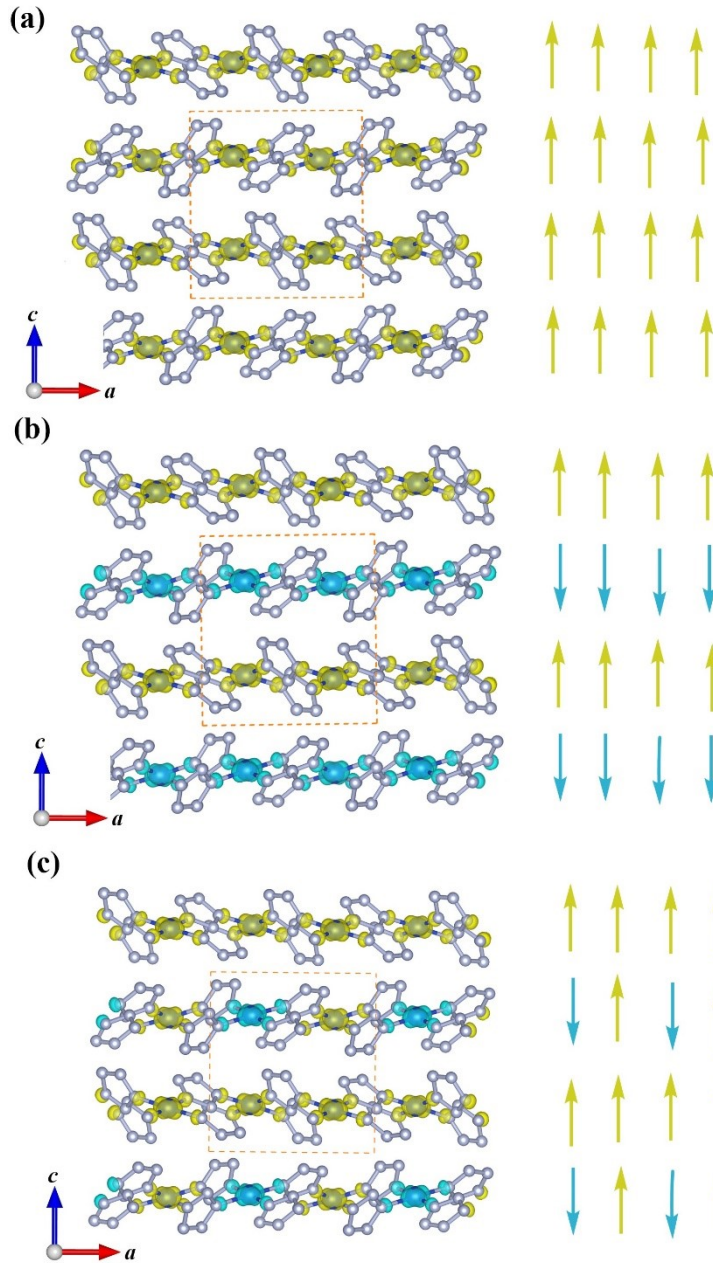

**Fig. S3.** Spin charge distribution of  $P2_12_12_1$ - $\text{CuN}_{10}$  crystal in (a) FM, (b) AFM2 and (c) FIM state. When referring to the energy of AFM1 ordering state, the energy of FM, AFM2 and FIM ordering states are 0.121, 0.118 and 0.061 eV/unit, respectively.
